# Supplementary material for: The yeast cell wall protein Pry3 inhibits mating through highly conserved residues within the CAP domain
Source: PubMed Central journal article supplement (PMC7340583; doi:10.1242/bio.053470), 2020-07-03
Supplement: biolopen-9-053470-s1.pdf [file biolopen-9-053470-s1.pdf]

## Supplementary Materials

## Supplementary Tables

Table S1. Yeast strains used in this study

| Strain         | Genotype                                                                                                           | Source           | Figure                      |
|----------------|--------------------------------------------------------------------------------------------------------------------|------------------|-----------------------------|
| BY4741         | <i>MATa; his3Δ1, leu2Δ0, met15Δ0, ura3Δ0</i>                                                                       | Euroscarf        | 1, 2B, 3C, 4B, 5, 7E, 7F, 8 |
| BY4742         | <i>MATa; his3Δ1, leu2Δ0, lys2Δ0, ura3Δ0</i>                                                                        | Euroscarf        | 1, 2B, 3C, 4B, 5, 7F, 8     |
| RSY6232        | [BY4741] <i>HSP150-MYC::HIS3MX6</i>                                                                                | This study       | 1C, 1D                      |
| <i>pry3Δ a</i> | [BY4741] <i>pry3Δ::kanMX4</i>                                                                                      | Euroscarf        | 1E                          |
| <i>pry3Δ α</i> | [BY4742] <i>pry3Δ::kanMX4</i>                                                                                      | Euroscarf        | 1E                          |
| RSY5858        | [BY4741] <i>pry3ΔS169-T242::URA3</i>                                                                               | This study       |                             |
| RSY5872        | [BY4741] <i>PRY3-mCHERRY</i>                                                                                       | This study       | 6B, 7                       |
| RSY5886        | [RSY5872] <i>URA3::ADH1<sup>prom</sup>::PRY3-mCHERRY</i>                                                           | This study       | 6, 7                        |
| RSY6513        | [RSY5886] <i>URA3::ADH1<sup>prom</sup>::PRY3<sup>H113A</sup>-mCHERRY</i>                                           | This study       | 6B                          |
| RSY6516        | [RSY5886] <i>URA3::ADH1<sup>prom</sup>::PRY3<sup>C142S</sup>-mCHERRY</i>                                           | This study       | 6B                          |
| RSY6538        | [RSY5886] <i>URA3::ADH1<sup>prom</sup>::PRY3<sup>E96A</sup>-mCHERRY</i>                                            | This study       | 6B                          |
| RSY5885        | [BY4742] <i>PRY3-mCHERRY</i>                                                                                       | This study       |                             |
| RSY5901        | [RSY5885] <i>URA3::ADH1<sup>prom</sup>::PRY3-mCHERRY</i>                                                           | This study       |                             |
| Fus1-GFP       | [BY4741] <i>ycl027w-GFP::HIS3MX6</i>                                                                               | Huh et al., 2003 | 7C                          |
| RSY6140        | <i>MATa; his3Δ1, leu2Δ0, lys2Δ0, met15Δ0, ura3Δ0, ycl027w-GFP::HIS3MX6, URA3::ADH1<sup>prom</sup>-PRY3-mCHERRY</i> | This study       | 7C                          |
| RSY6144        | <i>MATa; his3Δ1, leu2Δ0, met15Δ0, ura3Δ0, ycl027w-GFP::HIS3MX6, PRY3-mCHERRY</i>                                   | This study       | 7C                          |
| Mid2-GFP       | [BY4741] <i>ylr332w -GFP::HIS3MX6</i>                                                                              | Huh et al., 2003 | 7C                          |
| RSY6143        | <i>MATa; his3Δ1, leu2Δ0, lys2Δ0, met15Δ0, ura3Δ0, ylr332w-GFP::HIS3MX6, URA3::ADH1<sup>prom</sup>-PRY3-mCHERRY</i> | This study       | 7C                          |
| RSY6147        | <i>MATa; his3Δ1, leu2Δ0, met15Δ0, ura3Δ0, ylr332w-GFP::HIS3MX6 PRY3-mCHERRY</i>                                    | This study       | 7C                          |

**Table S2. Plasmids used in this study**

| Plasmids                | Genotype                                                        | Source                  | Figure                    |
|-------------------------|-----------------------------------------------------------------|-------------------------|---------------------------|
| pRS415                  | <i>CEN/ARS, ADH1<sup>prom</sup>, LEU2</i>                       | Mumberg et al., 1995    | 1, 2B, 3C, 4B, 5B, 7F, 8  |
| pRS426                  | <i>2μ, ADH1<sup>prom</sup>, URA3</i>                            | Mumberg et al., 1995    | 1, 2B, 3C, 4B, 5B, 7F, 8B |
| p1314                   | [pRS426] <i>ADH1<sup>prom</sup>-PRY1</i>                        | This study              | 1B                        |
| p1311                   | [pRS426] <i>ADH1<sup>prom</sup>-PRY2</i>                        | This study              | 1B                        |
| p1123                   | [pRS426] <i>ADH1<sup>prom</sup>-PRY3</i>                        | This study              | 1, 2B, 3C, 4B, 5B, 8B     |
| p1907                   | [pRS426] <i>ADH1<sup>prom</sup>-PRY1-HA</i>                     | This study              | 1C, 1D                    |
| p1908                   | [pRS426] <i>ADH1<sup>prom</sup>-PRY2-HA</i>                     | This study              | 1C, 1D                    |
| p1314                   | [pRS426] <i>ADH1<sup>prom</sup>-PRY3-HA</i>                     | This study              | 1C, 1D                    |
|                         | pFA6a-13Myc-His3MX6                                             | (Longtine et al., 1998) |                           |
| p1206                   | [pRS426] <i>ADH1<sup>prom</sup>-PRY3, LEU2</i>                  | This study              | 1E                        |
| p1124                   | [pRS426] <i>ADH1<sup>prom</sup>-PRY3-ΔGPI</i>                   | This study              | 1F                        |
| p1126                   | [pRS426] <i>ADH1<sup>prom</sup>-PRY3-CAP</i>                    | This study              | 1F                        |
| p1137                   | [pRS426] <i>ADH1<sup>prom</sup>-PRY3-S/T</i>                    | This study              | 1F                        |
| p1136                   | [pRS426] <i>ADH1<sup>prom</sup>-PRY3-ΔS/T</i>                   | This study              | 1F                        |
| p1138                   | [pRS426] <i>ADH1<sup>prom</sup>-PRY3-ssXmaI</i>                 | This study              |                           |
| p1334                   | [pRS426] <i>ADH1<sup>prom</sup>-PRY3-ΔCAP</i>                   | This study              | 1F                        |
| p1254                   | [pRS426] <i>ADH1<sup>prom</sup>-PRY3<sup>CAP-Prv1</sup></i>     | This study              | 2B                        |
| p1361                   | [pRS426] <i>ADH1<sup>prom</sup>-PRY3<sup>CAP-Prv2</sup></i>     | This study              | 2B                        |
| pET22b                  | <i>PelB, C-terminal His-tag, AmpR</i>                           | Novagen                 |                           |
| PRY1 <sup>CAP</sup> -HA | [pET22-b] <i>PRY1-CAP</i>                                       | Choudhary et al., 2014  | 3B, 3D                    |
| p1287                   | [pET22-b] <i>PRY3-CAP</i>                                       | This study              | 3B, 3D                    |
| p1336                   | [pET22-b] <i>PRY3<sup>C142S</sup>-CAP</i>                       | This study              | 3B                        |
| p1351                   | [pET22-b] <i>PRY3<sup>P105C, A155C</sup>-CAP</i>                | This study              | 3B                        |
| p1366                   | [pET22-b] <i>PRY3<sup>V117M</sup>-CAP</i>                       | This study              | 3D                        |
| p1281                   | [pRS426] <i>ADH1<sup>prom</sup>-PRY3<sup>C142S</sup></i>        | This study              | 3C                        |
| p1306                   | [pRS426] <i>ADH1<sup>prom</sup>-PRY3<sup>P105C, A155C</sup></i> | This study              | 3C                        |
| p1319                   | [pRS426] <i>ADH1<sup>prom</sup>-PRY3<sup>V117M</sup></i>        | This study              | 3C                        |
| p1516                   | [pRS426] <i>ADH1<sup>prom</sup>-PRY3<sup>H71A</sup></i>         | This study              | 4B                        |
| p1518                   | [pRS426] <i>ADH1<sup>prom</sup>-PRY3<sup>S72A</sup></i>         | This study              | 4B                        |
| p1517                   | [pRS426] <i>ADH1<sup>prom</sup>-PRY3<sup>E78A</sup></i>         | This study              | 4B                        |
| p1510                   | [pRS426] <i>ADH1<sup>prom</sup>-PRY3<sup>E96A</sup></i>         | This study              | 4B                        |

|          |                                                                                          |                       |       |
|----------|------------------------------------------------------------------------------------------|-----------------------|-------|
| p1511    | [pRS426] <i>ADHI<sup>prom</sup>-PRY3<sup>S103A</sup></i>                                 | This study            | 4B    |
| p1512    | [pRS426] <i>ADHI<sup>prom</sup>-PRY3<sup>H113A</sup></i>                                 | This study            | 4B    |
| p1202    | [pRS426] <i>ADHI<sup>prom</sup>-PRY3-AAXmal</i>                                          | This study            |       |
| pGREG506 | <i>CEN/ARS, GALI<sup>prom</sup> URA3</i>                                                 | Jansen et al., 2005   |       |
| pBS34    | mCherry                                                                                  | Hailey et al., 2002   |       |
| p1142    | [pGREG506] <i>PRY3<sup>prom</sup>-PRY3-PRY3<sup>3'-end</sup></i>                         | This study            |       |
| p1245    | [pRS426] <i>ADHI<sup>prom</sup>-PRY3-mCHERRY</i>                                         | This study            | 5B, C |
| p1283    | [pGREG506] <i>PRY3<sup>prom</sup>-PRY3-mCHERRY-PRY3<sup>3'-end</sup></i>                 | This study            | 5B, C |
| p1302    | [pRS426] <i>ADHI<sup>prom</sup>-PRY3<sup>C142S</sup>-mCHERRY</i>                         | This study            | 5B, C |
| p1810    | [pRS426] <i>ADHI<sup>prom</sup>-PRY3<sup>E96A</sup>-mCHERRY</i>                          | This study            | 5B, C |
| p1811    | [pRS426] <i>ADHI<sup>prom</sup>-PRY3<sup>H113A</sup>-mCHERRY</i>                         | This study            | 5B, C |
| p1309    | [pGREG506] <i>PRY3<sup>prom</sup>-PRY3<sup>C142S</sup>-mCHERRY-PRY3<sup>3'-end</sup></i> | This study            | 5B, C |
| p1812    | [pGREG506] <i>PRY3<sup>prom</sup>-PRY3<sup>E96A</sup>-mCHERRY-PRY3<sup>3'-end</sup></i>  | This study            | 5B, C |
| p1813    | [pGREG506] <i>PRY3<sup>prom</sup>-PRY3<sup>H113A</sup>-mCHERRY-PRY3<sup>3'-end</sup></i> | This study            | 5B, C |
| pRCC-K   | <i>2μ, ROX3p-cas9-CYCI<sup>ter</sup>, SNR52p-gRNA, kanMX</i>                             | Generoso et al., 2016 |       |
| p1918    | [pRCC-K] target sequence (3'-CAAATCCCGGATTTTCTGAATCCAC-5')                               | This study            |       |
| p1919    | [pRCC-K] target sequence (3'-GAGCGGTGGACGCCTGGTACG-5')                                   | This study            |       |
| p1920    | [pRCC-K] target sequence (3'-GTGTGCTCCTACAACCCTCC-5')                                    | This study            |       |
| pKT174   | [pFA6a] <i>link-yECFP, CaURA3</i>                                                        | Sheff and Thorn, 2004 |       |
| p1174    | [pRS415] <i>ADHIp-yECFP</i>                                                              | This study            | 6     |
| pKT211   | [pFA6a] <i>link-yEmCitrine, SpHIS5</i>                                                   | Sheff et al., 2004    |       |
| p1921    | [pRS415] <i>ADHIp- yEmCitrine</i>                                                        | This study            | 6     |
| pRS425   | <i>2μ, ADHI<sup>prom</sup>, LEU2</i>                                                     | Mumberg et al., 1995  |       |
| p2040    | [pRS425] <i>ADHI<sup>prom</sup>-PRY3<sup>ss</sup>-PRY3<sup>CAP</sup>-GFP-CCW12</i>       | This study            | 7E    |
| p2041    | [pRS425] <i>ADHI<sup>prom</sup>-PRY3<sup>ss</sup>-PRY3<sup>E96A, CAP</sup>-GFP-CCW12</i> | This study            | 7E    |

|                 |                                                                                    |                        |          |
|-----------------|------------------------------------------------------------------------------------|------------------------|----------|
| pRH2776         | [pRS413] <i>VAC8-vhhGFP4</i>                                                       | Powis et al.,<br>2015  |          |
| p1260           | [pRS426] <i>ADHI<sup>prom</sup>-PRY3-VHH</i>                                       | This study             |          |
| p1906           | [pRS426] <i>ADHI<sup>prom</sup>-PRY3<sup>E96A</sup>-VHH</i>                        | This study             |          |
| pGREG503        | <i>CEN/ARS, GALI<sup>prom</sup>, HIS3</i>                                          | Jansen et al.,<br>2005 |          |
| KAR2ss-CFP-HDEL | [pRS315] <i>PGKI<sup>prom</sup>-KAR2<sup>ss</sup>-CFP-HDEL</i>                     | Szymanski et al., 2007 |          |
| pKT128          | [pFA6a] <i>link-γEGFP, SpHIS5</i>                                                  | Sheff et al.,<br>2004  |          |
| p1719           | [pRS315] <i>PGKI<sup>prom</sup>-KAR2<sup>ss</sup>-GFP</i>                          | This study             | 8D, E, F |
| p1933           | [pRS315] <i>PGKI<sup>prom</sup>-PRY3<sup>ss</sup>-PRY3<sup>CAP</sup>-GFP</i>       | This study             | 8F       |
| p1934           | [pRS315] <i>PGKI<sup>prom</sup>-PRY3<sup>ss</sup>-PRY3<sup>E96A, CAP</sup>-GFP</i> | This study             | 8F       |

## References

- Choudhary, V., Darwiche, R., Gfeller, D., Zoete, V., Michelin, O. and Schneider, R.** (2014). The caveolin-binding motif of the pathogen-related yeast protein Pry1, a member of the CAP protein superfamily, is required for in vivo export of cholesteryl acetate. *J Lipid Res.* **55**, 883-894.
- Generoso, W. C., Gottardi, M., Oreb, M. and Boles, E.** (2016). Simplified CRISPR-Cas genome editing for *Saccharomyces cerevisiae*. *J Microbiol Methods.* **127**, 203-205.
- Hailey, D. W., Davis, T. N. and Muller, E. G.** (2002). Fluorescence resonance energy transfer using color variants of green fluorescent protein. *Methods Enzymol.* **351**, 34-49.
- Huh, W. K., Falvo, J. V., Gerke, L. C., Carroll, A. S., Howson, R. W., Weissman, J. S. and O'Shea, E. K.** (2003). Global analysis of protein localization in budding yeast. *Nature.* **425**, 686-691.
- Jansen, G., Wu, C., Schade, B., Thomas, D. Y. and Whiteway, M.** (2005). Drag&Drop cloning in yeast. *Gene.* **344**, 43-51.
- Longtine, M. S., McKenzie, A., Demarini, D. J., Shah, N. G., Wach, A., Brachat, A., Philippsen, P. and Pringle, J. R.** (1998). Additional modules for versatile and economical PCR-based gene deletion and modification in *Saccharomyces cerevisiae*. *Yeast.* **14**, 953-961.
- Mumberg, D., Muller, R. and Funk, M.** (1995). Yeast vectors for the controlled expression of heterologous proteins in different genetic backgrounds. *Gene.* **156**, 119-122.
- Powis, K., Zhang, T., Panchaud, N., Wang, R., De Virgilio, C. and Ding, J.** (2015). Crystal structure of the Ego1-Ego2-Ego3 complex and its role in promoting Rag GTPase-dependent TORC1 signaling. *Cell Res.* **25**, 1043-1059.

**Sheff, M. A. and Thorn, K. S.** (2004). Optimized cassettes for fluorescent protein tagging in *Saccharomyces cerevisiae*. *Yeast*. **21**, 661-670.

**Szymanski, K. M., Binns, D., Bartz, R., Grishin, N. V., Li, W. P., Agarwal, A. K., Garg, A., Anderson, R. G. and Goodman, J. M.** (2007). The lipodystrophy protein seipin is found at endoplasmic reticulum lipid droplet junctions and is important for droplet morphology. *Proc Natl Acad Sci U S A*. **104**, 20890-20895.
